# Micronutrient deficiency among pregnant adolescents in South Asia: A Systematic Review

Blessing Akombi-Inyang<sup>1\*</sup>, Mansi Dhama<sup>2,3</sup>, Judith Byaruhanga<sup>4</sup>, Zohra S. Lassi<sup>5,6</sup> and Kingsley Agho<sup>7,8</sup>

<sup>1</sup>School of Population Health, University of New South Wales, Sydney NSW 2052, Australia.

<sup>2</sup> School of Health Sciences, Western Sydney University, Penrith NSW 2571, Australia.

<sup>3</sup>The Children's Hospital, Westmead NSW 2145, Australia.

<sup>4</sup>School of Medicine and Public health, The University of Newcastle, Callaghan NSW, Australia.

<sup>5</sup>School of Public Health, University of Adelaide, Adelaide South Australia 5000

<sup>6</sup>Robinson Research Institute, Adelaide Medical School, The University of Adelaide, Adelaide South Australia 5000

<sup>7</sup>Translational Health Research Institute (THRI), Western Sydney University, Penrith NSW 2571, Australia.

<sup>8</sup>African Vision Research Institute (AVRI), University of KwaZulu-Natal, Durban 4041, South Africa.

\*Correspondence: Corresponding author Email: [b.akombi@unsw.edu.au](mailto:b.akombi@unsw.edu.au) (BA)

## Abstract

**Objectives:** Micronutrient deficiency is an important global health concern with great impact on growth and development outcomes, which may lead to substantial losses in overall productivity and potential. The burden of micronutrient deficiency negatively impacts the health of vulnerable groups, including pregnant adolescents. Hence, this study will systematically review the available evidence on micronutrient deficiency among pregnant adolescents in South Asia.

**Methods:** This systematic review adhered to the 2015 Preferred Reporting Items for Systematic reviews and Meta-Analysis (PRISMA) guidelines. A combination of selected keywords was used to search 8 computerized bibliographic databases: Scopus, Ovid

29 MEDLINE, PUBMED, EMBASE, PsycINFO, CINAHL, ProQuest, and Web of Science.  
30 Potential studies were imported into an Endnote library and screened for eligibility using pre-  
31 determined criteria. The quality of the included studies was assessed using the National  
32 Institutes of Health (NIH) checklist.

33 **Result:** There is a dearth of studies on micronutrient deficiency among pregnant adolescents  
34 in South Asia. Of a total of 616 studies, five studies met the inclusion criteria. The factors  
35 associated with micronutrient deficiency among pregnant adolescents in South Asia were food  
36 (in)security, intake of dairy products, low maternal knowledge, and inadequate food intake.

37 **Conclusion:** Our review suggested that lack of awareness and knowledge of adequate  
38 micronutrient intake and household food insecurity were associated with micronutrient  
39 deficiency among pregnant adolescents. Hence, interventions targeting pregnant adolescents  
40 are needed in South Asia and such interventions could include cash transfers integrated with  
41 nutrition and health interventions.

42 **Keywords:** Hidden hunger; nutrition; pregnancy; teenage pregnancy; South Asia

## 43 **Introduction**

44 Micronutrients are an important component of maternal nutrition and are essential for biologic  
45 activities. They comprise of essential minerals and vitamins mainly obtained from the diet for  
46 the sustenance of key cellular and molecular functions [1]. The role of micronutrients in disease  
47 prevention, human development, and well-being, including the regulation of metabolism, bone  
48 density, heartbeat, and cellular pH is quite important. Though needed in minute quantity,  
49 consuming the recommended amount is important at every stage of life. Micronutrient status  
50 varies widely throughout pregnancy and across populations. Of all micronutrients, six have  
51 been identified as essential including iron, vitamin A, vitamin D, iodine, folate, and zinc [2].  
52 Critical micronutrients in pregnancy include folate, calcium, iron, zinc, and iodine. Folate

53 insufficiency increases the risk of neural tube defects (NTD) while excessive intake of vitamin  
54 A may affect the normal development of an embryo or foetus [3]. Deficiencies in iodine,  
55 vitamin A and iron are the most common globally, particularly in pregnant women [3]. In low-  
56 and middle-income countries (LMICs), women often commence their pregnancy journey  
57 malnourished, and the demand of gestation exacerbates existing micronutrient deficiencies and  
58 increases their susceptibility to infections, with health consequences for the foetus [3, 4].

59 Due to a phase of rapid somatic growth for their bodies and for the foetus they are bearing,  
60 pregnant adolescent girls (much more than their adult counterparts) are susceptible to  
61 micronutrient deficiency [5 – 6]. The health and social complexities of the adolescent's  
62 transition to adulthood are far-reaching and well-documented [7, 8], but this is of-ten  
63 overlooked by family members and healthcare providers alike, accounting for why nutritional  
64 deficiencies is often missed [9]. The social change adolescents encounter often leads to  
65 unwanted pregnancies, which worsens an existing malnourished state [10, 11].

66 Approximately 12 million girls aged 15–19 years and at least 777,000 girls under 15 years give  
67 birth each year in developing regions [12, 13]. Pregnancy during adolescence poses significant  
68 risks of morbidity and mortality for both the mother and the baby, which may be exacerbated  
69 by micronutrient deficiency [14, 15]. Maternal nutritional status before and during early  
70 pregnancy is an important determinant of child health, especially among pregnant adolescents.

71 South Asia is home to one of the largest number of people with malnutrition globally [16].  
72 Countries in South Asia face widespread hunger and micronutrient deficiency which leads to  
73 challenges in population health. Pregnant women and children are most susceptible to  
74 micronutrient deficiencies due to higher physiological requirements during pregnancy and  
75 childhood development which often lead to in-creased demand for specific vitamins and  
76 minerals.

77 Despite the importance of micronutrients to pregnant adolescents, there is a dearth of evidence  
78 on the underlying factors that affect the micronutrient status of pregnant adolescents, especially  
79 in South Asia. Considering the similar sociocultural characteristics of populations across the  
80 region, there is a need to account for contextual factors that may exist which require a global  
81 health approach. Given the association between micronutrient deficiency and the wellbeing of  
82 pregnant adolescents as well as the growth and development of their foetus [17] we are curious  
83 about available evidence which could possibly inform the design of a tailored nutritional  
84 intervention to improve the health outcome of this vulnerable subgroup. This study reviews  
85 factors associated with micronutrient deficiency in pregnant adolescents in South Asia,  
86 drawing on evidence from previous studies and discussing the need for more robustly designed  
87 studies on micronutrient deficiency in pregnant adolescents and provide a stronger evidence  
88 base against which future nutritional interventions can be developed.

## 89 **Methods**

90 This systematic review was conducted in accordance with the Preferred Reporting Items for  
91 Systematic Reviews and Meta-Analyses (PRISMA) guidelines (S1). The PRISMA statement  
92 is a detailed checklist with 27 essential items for ensuring reporting transparency [18]. To avoid  
93 duplication, Google scholar and Cochrane library were initially searched to ensure no  
94 systematic reviews or meta-analyses on micro-nutrient deficiency among pregnant adolescents  
95 in South Asia had been previously conducted.

96 This systematic review is registered in PROSPERO international prospective registry for  
97 systematic reviews with reference CRD42020173325.

## 98 **Outcome variable**

99 The outcome variable for this review is adolescent pregnancy, defined as pregnancy in women  
100 aged 10-19 years [19].

## 101 **Exploratory variable**

102 Micronutrient deficiencies, which is defined as a lack of essential vitamins and minerals  
103 required in small amounts by the body for proper growth and development. They include (but  
104 not limited to) iron, vitamin A, calcium, vitamin D, iodine, folate, and zinc [1, 2].

## 105 **Search strategy**

106 Following discussion of the research question among the authors, a list of relevant keywords  
107 was generated and used to comprehensively search for peer-reviewed articles from eight  
108 computerized biblio-graphic databases: Scopus, Ovid Medline, Embase, CINAHL, PubMed,  
109 ProQuest, PsycINFO, Web of Science. The following combination of keywords was used in  
110 the search:

111 (Micronutrien\* OR vitamin A OR vitamin D OR iron OR zinc OR iodine)

112 AND

113 (Pregnant adolescent\* OR pregnant teenager OR adolescent pregnanc\* OR teenage pregnanc\*)

114 AND

115 (India OR Pakistan OR Bangladesh OR Sri Lanka OR Nepal OR Afghanistan OR Bhutan OR  
116 Maldives OR South Asia)

117 The search was restricted to only studies conducted in South Asia with no publication year  
118 limitation. The studies retrieved from each database were exported into an EndNote library. In  
119 the case of relevant publications which might have been missed during the search, the  
120 bibliographical references of all retrieved studies that met the eligibility criteria were also  
121 searched and complemented by citation tracking using Google Scholar.

## 122 **Inclusion and Exclusion Criteria**

123 We included studies that focused on: (i) pregnant adolescents aged 10 – 19 years; (ii) were  
124 conducted in South Asia (Afghanistan, India, Pakistan, Bangladesh, Sri Lanka, Nepal, Bhutan  
125 and Maldives); (iii) analyzed factors associated with micronutrient deficiency; (iv) were  
126 published in a peer-reviewed journal and their full texts were available; (v) were written in  
127 English and accessible as we did not have the logistical and financial capacity to translate  
128 literature published in languages other than English.

129 Studies were excluded if they focused on: (i) non-pregnant adolescents or pregnant/non-  
130 pregnant adult women; (ii) conducted in countries outside South Asia; (iii) published in  
131 languages other than English; (iv) were non-peer-reviewed research, reviews, commentaries,  
132 editorials, letters to editors, and opinion pieces; (v) and/or did not assess the factors associated  
133 micronutrient deficiency.

#### 134 **Data extraction**

135 The retrieved studies from the search of the databases were exported into an EndNote library,  
136 and all duplicates were removed. The exported articles were first screened by title and abstract.  
137 Thereafter, their full texts were assessed against the eligibility criteria. All aspects of data  
138 screening, extraction, and appraisals of identified studies were carried out by two independent  
139 reviewers (BA and MD), and all disagreements between the two reviewers were resolved  
140 through discussion and consensus. Where uncertainty emerged, a third reviewer (KA) was  
141 consulted to adjudicate differences in the selection of the final studies for inclusion.

142 A piloted form adapted from the Cochrane Handbook for Systematic Reviews [20] was used  
143 in the extraction of data from eligible studies. Data extracted include author, year of  
144 publication, country, study design, sample characteristics, micronutrient/deficient  
145 micronutrient, factors associated with micronutrient deficiency and quality assessment score  
146 (Table 1).

147 **Table 1: Characteristics of included studies**

| Author [Ref]<br>Year, Country                          |                            | Study design             | Study aim                                                                                                                                                                                           | Sample Characteristics<br>(N = Number of<br>participants)                                        | Micronutrient/<br>Micronutrient<br>Deficiency                          | Factors associated<br>with Micronutrient<br>Deficiency                              | Quality<br>Assessment<br>[0 -10<br>points] |
|--------------------------------------------------------|----------------------------|--------------------------|-----------------------------------------------------------------------------------------------------------------------------------------------------------------------------------------------------|--------------------------------------------------------------------------------------------------|------------------------------------------------------------------------|-------------------------------------------------------------------------------------|--------------------------------------------|
| Rang-Din Nutrition<br>Study [21, 22]<br><br>Bangladesh | Dewey et al. [21]<br>2019  | Cross-sectional<br>study | To examine the effects of prenatal nutritional supplementation among pregnant adolescents and to explore whether the effects of the intervention differed by household food security                | N = 1552<br><br>Average age: 17.4 ± 1.3 years<br><br>Average gestational age: 13 weeks           | Not specified                                                          | Food insecurity                                                                     | 7                                          |
|                                                        | Mridha et al. [22]<br>2018 | Cross-sectional<br>study | To describe the nutritional and dietary characteristics of rural Bangladeshi adolescents during early pregnancy and identify factors associated with their nutritional status and dietary practices | N = 1552<br><br>Average age = 17.4 ± 1.3 years<br><br>Average gestational age = 13.0 ± 3.4 weeks | Iron Deficiency<br>Anaemia                                             | Higher intake of<br>dairy products                                                  | 7                                          |
| Bano F. [23]<br><br>2019<br><br>India                  |                            | Cross-sectional<br>study | To estimate the prevalence of anaemia among pregnant women and its association with the various socio-demographic determinants in urban areas of Kanpur.                                            | N = 40<br><br>Age = <20 years                                                                    | Iron Deficiency<br>Anaemia                                             | Inadequate iron-folic<br>acid supplementation,<br>lack of antenatal<br>registration | 6                                          |
| Nguyen et al. [24]<br><br>2017<br><br>BangladeshV      |                            | Cross-sectional<br>study | To compare maternal and child nutrition and health conditions of pregnant adolescents with those of non-adolescents                                                                                 | N = 404<br><br>Age = 13–19 years                                                                 | Calcium<br>Deficiency                                                  | Low maternal<br>knowledge                                                           | 7                                          |
| Pathak et al. [25]<br><br>2003<br><br>India            |                            | Cross-sectional<br>study | To assess the prevalence of iron, vitamin A and iodine deficiencies amongst rural Adolescent Pregnant Mothers                                                                                       | N = 151<br><br>Average age = 17.8±1.5 years<br><br>Gestational age = ≥24 weeks                   | Iron Deficiency<br>Anaemia and<br>Vitamin A <sub>1</sub><br>Deficiency | Inadequate dietary<br>intake of<br>micronutrients                                   | 7                                          |

## 149 **Quality Assessment**

150 Quality assessment of studies involves considering the risk of potential for selection bias, information  
151 bias, measurement bias, or confounding. The quality of the retrieved studies was assessed using the  
152 National Institutes of Health (NIH) checklist [26]. This checklist considers 14 distinct criteria in  
153 assessing the internal validity of studies. Scores apportioned to each included study range from 0 [if  
154 none of the criteria were met] to 14 points [if all criteria were met]. The overall quality of a study is  
155 dependent on the sum of points awarded. Studies rated as poor quality had a score <4, medium quality  
156 5 – 9, while high quality studies had a score between 10 and 14, as minimal risk of bias and vice versa  
157 [26]. In addition, the more emphasis in the study design to issues around the establishment of a causal  
158 relationship between the expo-sure and outcome, the higher the quality of the study. Emerging evidence  
159 suggests that the NIH checklist is a robust tool for assessing risk bias in controlled intervention studies  
160 and cross-sectional studies [26-29].

## 161 **Results**

162 The initial search yielded 616 studies from eight databases. After the removal of duplicates, 554 studies  
163 were retained. Screening by title and abstract resulted in the exclusion of 543 studies. The full texts of  
164 the remaining 11 studies were retrieved and read for eligibility and relevance, and nine studies were  
165 further excluded. Two studies met the eligibility criteria. A further manual search of the reference lists  
166 of the eligible studies identified two additional studies, resulting in a total of 5 studies included in this  
167 review, as shown in Figure 1.

168 **Figure 1.** PRISMA flowchart for the selection of eligible studies

## 169 **Characteristics of Included Studies**

170 Table 1 shows a summary of the studies included in this review. Three studies were conducted in  
171 Bangladesh, and two in India. The sample size in the retained studies varied from 151 to 2000  
172 participants, while the age was between 13 to 19 years. The 14 criteria used to evaluate the quality of



173 included studies showed that all four studies were of medium quality. The details of the domain-specific  
174 score are provided in Supplementary Table S2.

## 175 **Discussion**

176 A significant proportion of adolescent girls suffer from micronutrient deficiency, which may be made  
177 worse by pregnancy. Our finding suggests a dearth of studies on micronutrient deficiency among  
178 pregnant adolescents in South Asia. Of the studies re-viewed, the factors associated with micronutrient  
179 deficiency among pregnant adolescents in South Asia were food (in)security, advancing age, inadequate  
180 iron-folic acid supplementation, lack of antenatal registration, intake of dairy products, low maternal  
181 knowledge, and inadequate intake of food.

### 182 **Food (in)security**

183 Dewey et al. [21] reported that women in food-insecure households are more likely to suffer from both  
184 macro- and micronutrient deficiencies during pregnancy, and this was evident in the subset of pregnant  
185 adolescents in the study. Inadequate intake of micronutrients in food insecure households could result  
186 from under-consumption of food or over-consumption of an energy-dense, but nutrient-poor diet. This  
187 might be more pronounced among pregnant adolescents due to lack of financial autonomy and  
188 knowledge to make more nutrition informed decision. Dewey et al. [21] also observed that food  
189 insecurity prevents pregnant adolescents from responding to nutrition supplementation interventions  
190 during the prenatal period. The uptake of these interventions is particularly important for pregnant  
191 adolescents with suboptimal micronutrient intake, as these interventions could serve as effective  
192 solutions to micronutrient deficiency in pregnancy. Furthermore, evidence has shown that food  
193 insecurity adversely affects women throughout their reproductive life from preconception [30] through  
194 to the postnatal period, with the pregnant adolescent being the most impacted [31]. A study conducted  
195 in Bangladesh reported that household food insecurity is a significant predictor of iron deficiency  
196 anaemia among women of reproductive age [32]. The finding from the Bangladeshi study was  
197 buttressed by other studies conduct-ed in Brazil and the United States, which also reported a chance of  
198 2.63 and 3 times higher of pregnant women developing iron deficiency anaemia in food insecurity

199 compared with those in situations of food security, respectively. The findings from these studies could  
200 be extrapolated to food-insecure pregnant adolescent women in South Asia due to their greater  
201 propensity towards micronutrient deficiency. In addition, a recent multicounty survey showed that the  
202 likelihood of anaemia is significantly higher among younger women [33]. Among other reasons, iron  
203 and folic acid deficiencies were the leading cause.

#### 204 **Intake of dairy products**

205 Dairy products are not only deficient in Vitamin C which is one of the main enhancers of iron  
206 absorption, but they are also very low in iron content and inhibit the absorption of iron present in other  
207 foods, for instance, calcium and phosphates in milk form insoluble complexes with iron. In their study,  
208 Mridha et al. [22] reported that iron deficiency is associated with a higher intake of dairy products. Milk  
209 and other dairy products can interfere with the gut's ability to absorb iron from other sources, such as  
210 meat, meat alternatives, and dark green vegetables. One possible mechanism is the inhibition of non-  
211 heme iron absorption by calcium and casein present in dairy products [34]. However, Mridha et al. [22]  
212 ruled out this mechanism because only 10% of the study population exhibited iron deficiency. Though  
213 research has shown that infant and toddler consumption of dairy products, especially cow's milk, has  
214 adverse effects on their iron stores, no conclusive evidence has been found on the association between  
215 the intake of dairy products and micronutrient deficiency in pregnant adolescents.

#### 216 **Lack of antenatal care**

217 Bano F. [23] reported a lack of antenatal registration among pregnant adolescent girls. Young girls are  
218 at increased risk of maternal and foetal complications due to in-adequate antenatal care and appropriate  
219 nutrition. Antenatal care is essential for the health and wellbeing of both the mother and the newborn.  
220 Adequate antenatal care can help identify and manage potential pregnancy complications, including  
221 pre-eclampsia, gestational diabetes, and other medical conditions. It also provides an opportunity for  
222 healthcare providers to educate mothers on healthy practices such as good nutrition, exercise, and the  
223 importance of prenatal vitamins. The lack of antenatal visits in adolescent pregnant women can increase  
224 the risk of pregnancy-related complications and adverse birth outcomes. An antenatal visit provides an

225 opportunity to screen pregnant women for micronutrient deficiencies and provide them with ap-  
226 propriate supplements, monitor the foetus's growth and development, intervene with appropriate  
227 supplements, and medical problems that may increase the risk of micronutrient deficiencies. It is  
228 suggested that first-time mothers and, more importantly, adolescent mothers receive information related  
229 to prenatal and postnatal care from antenatal visits to healthcare providers [33]. It is important that  
230 efforts are be made to increase awareness of the unique needs and challenges faced by adolescent  
231 pregnant women, including social and economic factors that may impact their health and well-being.

### 232 **Inadequate iron folic acid supplementation (IFAS)**

233 Folic acid is required for the rapid manufacture and growth of red blood cells which is highly needed  
234 by pregnant adolescents due to the rapid growth and expansion of blood volume and muscle mass which  
235 accompanies adolescence and pregnancy [35]. Iron-folic acid supplementation is a recommended public  
236 health strategy to pre-vent unfavourable birth outcomes and adverse hematologic complications during  
237 pregnancy [36, 37]. The WHO recommends IFAS to all pregnant women in a standard dose of 30 mg–60  
238 mg iron and 400µg folic acid daily throughout pregnancy [38]. Bano F. [23] reported inadequate IFAS  
239 among pregnant adolescent girls. Inadequate iron-folic acid supplementation intake for pregnant  
240 adolescent women is a significant concern. These deficiencies can result in serious health problems for  
241 mothers and children. A lack of iron can lead to anaemia, which increases the risk of premature birth,  
242 low birth weight and infant mortality. Additionally, iron-folic acid deficiency in pregnancy can increase  
243 the risk of neural tube defects, endocrine disorders, and cardiac defects. Provision of IFA  
244 supplementation to adolescents from the commencement of menstruation would ensure adolescents  
245 commence pregnancy with the appropriate IFA levels. This would help prevent the reported adverse  
246 maternal and neonatal out-comes including miscarriages, stillbirths, neonatal or maternal mortality  
247 associated with inadequate intake of IFA Supplementation.

### 248 **Low maternal knowledge**

249 Nguyen et al. [23] reported that knowledge of the benefits of consuming calcium was lower in pregnant  
250 adolescents compared to adult women. The knowledge, availability and access to essential food groups

251 that ensure a supply of nutrients are essential in improving maternal nutrition, especially during  
252 pregnancy. Adequate maternal knowledge of the importance of micronutrients in pregnancy is crucial  
253 to the uptake of these micronutrients. Studies have shown that low maternal knowledge negatively  
254 impacts women's health and could lead to less utilization of healthcare services and poor uptake of  
255 nutrition interventions, especially in pregnancy [39, 40]. This could also be extended to the subset of  
256 pregnant adolescent girls. A study conducted in Kenya to determine maternal iron and folic acid  
257 supplementation (IFAS) programme knowledge among pregnant women found that older women aged  
258  $\geq 30$  years and women with higher education were more likely to have greater knowledge of the  
259 nutritional intervention programme and hence its benefits. The study also found that the level of ma-  
260 ternal IFAS knowledge progressively increased with age and education [39]. However, there are limited  
261 studies on the impact of low maternal knowledge on micronutrient deficiency among pregnant  
262 adolescents.

### 263 **Inadequate dietary intake of micronutrients**

264 Adequate intake of micronutrients is important for maternal health during pregnancy and optimal foetal  
265 growth and development. In the case of adolescent mothers, the long-term impacts of suboptimal  
266 nutritional status are considerable. The period of adolescence is a critical stage in human development  
267 during which lifetime behaviours are established and the dietary habits acquired during this period could  
268 enhance or undermine health throughout life [41]. Pathak et al. [25] reported a high prevalence of iron  
269 deficiency anaemia and vitamin A deficiency among pregnant adolescent mothers due to low dietary  
270 iron and vitamin A intake, respectively. Pathak et al. [25] also found that dietary nutrient intake among  
271 pregnant adolescents was significantly less compared to the recommended dietary allowance (RDA)  
272 for their respective ages and sex. With the increase in micronutrient requirements in pregnancy beyond  
273 the dietary energy requirements [42, 43], it is essential that pregnant adolescents maintain an ad-equate  
274 amount of dietary intake of micronutrients to meet up with these increased requirements. Previous  
275 studies have highlighted the need for adequate dietary intake of micronutrients by pregnant mothers to  
276 prevent adverse health outcomes in the mother and the foetus both immediately and in later life [44,

277 45]. This same need for adequate dietary intake could also be applicable to pregnant adolescents  
278 especially given their compromised development status.

## 279 **Strengths and Limitations**

280 This systematic review is a comprehensive search of existing literature on micro-nutrient deficiency  
281 among pregnant adolescents in South Asia. All studies included in this review were of medium quality  
282 due to each studies' ability to establish causal relationship between the exposure and the outcome.  
283 Despite its strengths, this study also had some limitations. First, due to the small number of studies, the  
284 generalisability, and transferability of the findings of this study to entire South Asia should be done  
285 with caution. Second, the included studies were not nation-wide studies hence caution should also be  
286 taken when generalizing individual study findings to the respective countries. Third, qualitative studies  
287 were not included in this review as the studies selected were restricted to quantitative studies. Research  
288 has shown that the inclusion of qualitative studies in systematic reviews enables triangulation of  
289 findings or offer alternative explanations [46]. Fourth, while this review summarized the underlying  
290 causes of micronutrient deficiency among pregnant adolescents, it does not address the societal causes.  
291 Finally, the discussion of the predisposing factors to micronutrient deficiency among pregnant  
292 adolescents is grossly limited due to the lack of available studies. As there is no minimum number of  
293 studies to be included in a systematic review to make it valid, the number of studies captured in this  
294 paper is largely dependent on the research topic, as well as the amount of supportive evidence available.  
295 A lack of studies reveals the field's lack of research and knowledge gaps. However, what primarily  
296 makes a systematic review is the systematic process followed, our study adhered to PRISMA guidelines,  
297 and its protocol was duly registered with PROSPERO. It should also be noted that our study did not  
298 include grey literature. According to NIH, searching grey literature is important because sometimes  
299 only positive studies with significant findings are published in peer-reviewed literature, which can bias  
300 the results of a review. Hence, inclusion of grey literature would make for a more robust exploration of  
301 available evidence which would make our study stronger.

## 302 **Conclusion**

303 Due to limited research, conclusions cannot be drawn about the impact of micronutrient deficiency on  
304 pregnant adolescents. The results of the present study indicate a need for more research to be undertaken  
305 in different countries of South Asia to assess the magnitude of micronutrient deficiencies amongst  
306 pregnant adolescent mothers. In this review, food insecurity and limited knowledge of adequate intake  
307 of micronutrients were key factors associated with micronutrient deficiency among pregnant  
308 adolescents. It is important to address these concerns by providing adequate health care services,  
309 education, and support to adolescent pregnant women. This can include promoting the importance of  
310 antenatal care, providing prenatal vitamins and supplements, and ensuring access to nutritious foods.  
311 Findings from this review could provide public health research with the requisite tools to establish  
312 appropriate public health interventions to minimise the burden of micronutrient deficiency among  
313 pregnant adolescents in South Asia. Integrated nutrition-sensitive interventions, including food  
314 subsidies, provision of nutrient-rich foods, and health services coupled with behaviour change, may  
315 improve the nutrition of pregnant adolescents in South Asia.

### 316 **Funding Information**

317 No grant was received for this study from any funding agency in the public, commercial or not-for-  
318 profit sectors.

### 319 **Author Contributions**

320 This study was designed by B.A. and K.A.; analysis was carried out by B.A., M.D. and J.B.; the  
321 manuscript was drafted by B.A. while Z.S.L., K.A and B.A. were involved in the revision and editing  
322 of the manuscript. All authors read and approved the final manuscript.

### 323 **Conflicts of Interest**

324 The authors declare no conflict of interest.

## 325 **References**

326 1] Bailey RL, West Jr KP, Black RE. The epidemiology of global micronutrient deficiencies. *Annals*  
327 *of Nutrition and Metabolism*. 2015;66(Suppl. 2):22-33.

- 328 2] Centers for Disease Control and Prevention. Micronutrient facts. Available online at:  
329 <https://www.cdc.gov/nutrition/micronutrient-malnutrition/micronutrients/index.html> (accessed on 6  
330 October 2023)
- 331 3] WHO. Micronutrients. Available online at: [https://www.who.int/health-](https://www.who.int/health-topics/micronutrients#tab=tab_1)  
332 [topics/micronutrients#tab=tab\\_1](https://www.who.int/health-topics/micronutrients#tab=tab_1) (accessed on 6 October 2023).
- 333 4] Gernand AD, Schulze KJ, Stewart CP, West KP, Christian P. Micronutrient deficiencies in pregnancy  
334 worldwide: health effects and prevention. *Nature Reviews Endocrinology*. 2016 May;12(5):274-89.
- 335 5] WHO. Global health estimates 2015: deaths by cause, age, sex, by country and by region, 2000–  
336 2015. Geneva: WHO; 2016.
- 337 6] Finlay JE, Özaltın E and Canning D, The association of maternal age with infant mortality, child  
338 anthropometric failure, diarrhoea and anaemia for first births: evidence from 55 low- and middle-  
339 income countries, *BMJ Open*, 2011, 1(2):e000226, doi:10.1136/bmjopen-2011-000226.
- 340 7] Branca F, Piwoz E, Schultink W, Sullivan LM. Nutrition and health in women, children, and  
341 adolescent girls. *BMJ*. 2015;351:h4173. pmid:26371218
- 342 8] Temmerman M, Khosla R, Bhutta ZA, Bustreo F. Towards a new Global Strategy for Women's,  
343 Children's and Adolescents' Health. *BMJ*. 2015;351:h4414. pmid:26371228
- 344 9] WHO. Programming for adolescent health and development report of WHO/UNFPA/UNICEF study  
345 group on programming for adolescents health. Geneva: WHO; 1999.
- 346 10] Rah, J.H., P. Christian, A.A. Shamim, et al. 2008. Pregnancy and lactation hinder growth and  
347 nutritional status of adolescent girls in rural Bangladesh. *J. Nutr.* 138: 1505–1511.
- 348 11] Adolescent sexual and reproductive health: The global challenges. Morris JL, Rushwan H *Int J*  
349 *Gynaecol Obstet*. 2015 Oct; 131 Suppl 1():S40-2.
- 350 12] Darroch J, Woog V, Bankole A, Ashford LS. Adding it up: Costs and benefits of meeting the  
351 contraceptive needs of adolescents. New York: Guttmacher Institute; 2016.

- 352 13] UNFPA. *Girlhood, not motherhood: Preventing adolescent pregnancy*. New York: UNFPA; 2015.
- 353 14] Johnson W, Moore SE. Adolescent pregnancy, nutrition, and health outcomes in low-and  
354 middle-income countries: what we know and what we don't know. *Bjog*. 2016 Sep;123(10):1589.
- 355 15] Christian P, Khattry SK, Katz J, Pradhan EK, LeClerq SC, Shrestha SR, Adhikari RK, Sommer A,  
356 Keith PW. Effects of alternative maternal micronutrient supplements on low birth weight in rural Nepal:  
357 double blind randomised community trial. *Bmj*. 2003 Mar 15;326(7389):571.
- 358 16] Fanzo J, Hawkes C, Udomkesmalee E, Afshin A, Allemandi L, Assery O, Baker P, Battersby J,  
359 Bhutta Z, Chen K, Corvalan C. 2018 Global Nutrition Report: Shining a light to spur action on nutrition.
- 360 17] Black RE, Victora CG, Walker SP, Bhutta ZA, Christian P, de Onis M, et al. Maternal and child  
361 undernutrition and overweight in low-income and middle-income countries. *Lancet* 2013; 382:427–51.
- 362 18] Page MJ, McKenzie JE, Bossuyt PM, Boutron I, Hoffmann TC, Mulrow CD, et al. The PRISMA  
363 2020 statement: an updated guideline for reporting systematic reviews. *Systematic Reviews* 2021; 10:89
- 364 19] World Health Organization. *Adolescent Pregnancy*. 2004; Available from:  
365 [http://apps.who.int/iris/bitstream/handle/10665/42903/9241591455\\_eng.pdf?sequence=1](http://apps.who.int/iris/bitstream/handle/10665/42903/9241591455_eng.pdf?sequence=1).
- 366 20] Higgins, J.P.; Green, S. *Cochrane Handbook for Systematic Reviews of Interventions*. Available  
367 online: <http://handbook.cochrane.org> (accessed on 30 September 2023)
- 368 21] Dewey KG, Matias SL, Mridha MK, Arnold CD. Nutrient supplementation during the first 1000  
369 days and growth of infants born to pregnant adolescents. *Annals of the New York Academy of Sciences*.  
370 2019 Aug 4.
- 371 22] Mridha MK, Matias SL, Arnold CD, Dewey KG. Factors associated with nutritional status and  
372 dietary practices of Bangladeshi adolescents in early pregnancy. *Annals of the New York Academy of*  
373 *Sciences*. 2018 Mar;1416(1):66-76.



- 374 [23] Bano, F. High-Risk Screening for Anaemia among Pregnant Women and Its Correlation with  
375 Socio-Demographic Factors in Urban Areas of Northern India. *International Journal of Health Sciences*  
376 *and Research*. 2019 Aug; 9 (8):43-50
- 377 24] Nguyen PH, Sanghvi T, Tran LM, Afsana K, Mahmud Z, Aktar B, Haque R, Menon P. The nutrition  
378 and health risks faced by pregnant adolescents: insights from a cross-sectional study in Bangladesh.  
379 *PloS one*. 2017;12(6).
- 380 25] Pathak P, Singh P, Kapil U, Raghuvanshi RS. Prevalence of iron, vitamin A, and iodine deficiencies  
381 amongst adolescent pregnant mothers. *The Indian Journal of Pediatrics*. 2003 Apr 1;70(4):299-301.
- 382 26] National Heart Lung and Blood Institute (NIH). Quality Assessment Tool for Observational Cohort  
383 and Cross-Sectional Studies. Available online: [https://www.nhlbi.nih.gov/health-topics/study-quality-](https://www.nhlbi.nih.gov/health-topics/study-quality-assessment-tools)  
384 [assessment-tools](https://www.nhlbi.nih.gov/health-topics/study-quality-assessment-tools) (accessed on 30 September 2023)
- 385 27] Mangin D, Stephen G, Bismah V, Risdon C. Making patient values visible in healthcare: a  
386 systematic review of tools to assess patient treatment priorities and preferences in the context of  
387 multimorbidity. *BMJ open*. 2016 Jun 1;6(6):e010903.
- 388 28] Ward JL, Harrison K, Viner RM, Costello A, Heys M. Adolescent cohorts assessing growth,  
389 cardiovascular and cognitive outcomes in low and middle-income countries. *PloS one*. 2018;13(1).
- 390 29] Woolford MH, Weller C, Ibrahim JE. Unexplained absences and risk of death and injury among  
391 nursing home residents: A systematic review. *Journal of the American Medical Directors Association*.  
392 2017 Apr 1;18(4):366-e1.
- 393 30] Pobee RA, Aguree S, Colecraft EK, Gernand AD, Murray-Kolb LE. Food Insecurity and  
394 Micronutrient Status among Ghanaian Women Planning to Become Pregnant. *Nutrients*. 2020  
395 Feb;12(2):470.
- 396 31] Grilo SA, Earnshaw VA, Lewis JB, Stasko EC, Magriples U, Tobin J, Ickovics JR. Food matters:  
397 Food insecurity among pregnant adolescents and infant birth outcomes. *Journal of Applied Research*  
398 *on Children: Informing Policy for Children at Risk*. 2015;6(2):4.

- 399 32] Ghose B, Tang S, Yaya S, Feng Z. Association between food insecurity and anaemia among women  
400 of reproductive age. *PeerJ*. 2016 May 5;4:e1945.
- 401 33] Sunuwar DR, Singh DR, Chaudhary NK, Pradhan PM, Rai P, Tiwari K. Prevalence and factors  
402 associated with anaemia among women of reproductive age in seven South and Southeast Asian  
403 countries: Evidence from nationally representative surveys. *PLOS one*. 2020 Aug 13;15(8): e0236449.
- 404 34] Ziegler EE. Consumption of cow's milk as a cause of iron deficiency in infants and toddlers.  
405 *Nutrition reviews*. 2011 Nov 1;69(suppl\_1): S37-42.
- 406 35] UNICEF. Iron & Folic Acid (IFA) Supplementation for Adolescent Girls and Women. Available  
407 at: <https://www.unicef.org/ghana/media/1331/file/UN157895.pdf> (Accessed on 9 October 2023).
- 408 36] Fiedler JL, D'Agostino A. A rapid initial assessment of the distribution and consumption of iron-  
409 folic acid tablets through antenatal care in Honduras.
- 410 37] Lumley J, Watson L, Watson M, Bower C, Cochrane Pregnancy and Childbirth Group.  
411 Periconceptional supplementation with folate and/or multivitamins for preventing neural tube defects.  
412 *Cochrane database of systematic reviews*. 1996 Sep 1;2010(1).
- 413 38] World Health Organization. Guideline: daily iron and folic acid supplementation in pregnant  
414 women. World Health Organization; 2012.
- 415 39] Bhutta ZA, Gupta I, de'Silva H, Manandhar D, Awasthi S, Hossain SM, Salam M. Maternal and  
416 child health: is South Asia ready for change?. *BMJ*. 2004 Apr 1;328(7443):816-9.
- 417 40] Kamau MW, Mirie W, Kimani ST. Maternal knowledge on iron and folic acid supplementation and  
418 associated factors among pregnant women in a rural County in Kenya. *International Journal of Africa  
419 Nursing Sciences*. 2019 Jan 1; 10:74-80.
- 420 41] Cavadini C, Siega-Riz AM, Popkin BM. US adolescent food intake trends from 1965 to 1996.  
421 *Archives of disease in childhood*. 2000 Jul 1;83(1):18-24.

- 422 42] Marangoni F, Cetin I, Verduci E, Canzone G, Giovannini M, Scollo P, Corsello G, Poli A. Maternal  
423 diet and nutrient requirements in pregnancy and breastfeeding. An Italian consensus document.  
424 *Nutrients*. 2016 Oct;8(10):629.
- 425 43] Koletzko B, Bauer CP, Bung P, Cremer M, Flothkötter M, Hellmers C, Kersting M, Krawinkel M,  
426 Przyrembel H, Rasenack R, Schäfer T. German national consensus recommendations on nutrition and  
427 lifestyle in pregnancy by the 'Healthy Start-Young Family Network'. *Annals of Nutrition and*  
428 *Metabolism*. 2013;63(4):311-22.
- 429 44] Cetin I, Bühling K, Demir C, Kortam A, Prescott SL, Yamashiro Y, Yarmolinskaya M, Koletzko  
430 B. Impact of Micronutrient Status during Pregnancy on Early Nutrition Programming. *Annals of*  
431 *Nutrition and Metabolism*. 2019;74(4):269-78.
- 432 45] Mousa A, Naqash A, Lim S. Macronutrient and micronutrient intake during pregnancy: an overview  
433 of recent evidence. *Nutrients*. 2019 Feb;11(2):443.
- 434 46] Grant MJ, Booth A. A typology of reviews: an analysis of 14 review types and associated  
435 methodologies. *Health information & libraries journal*. 2009 Jun;26(2):91-108



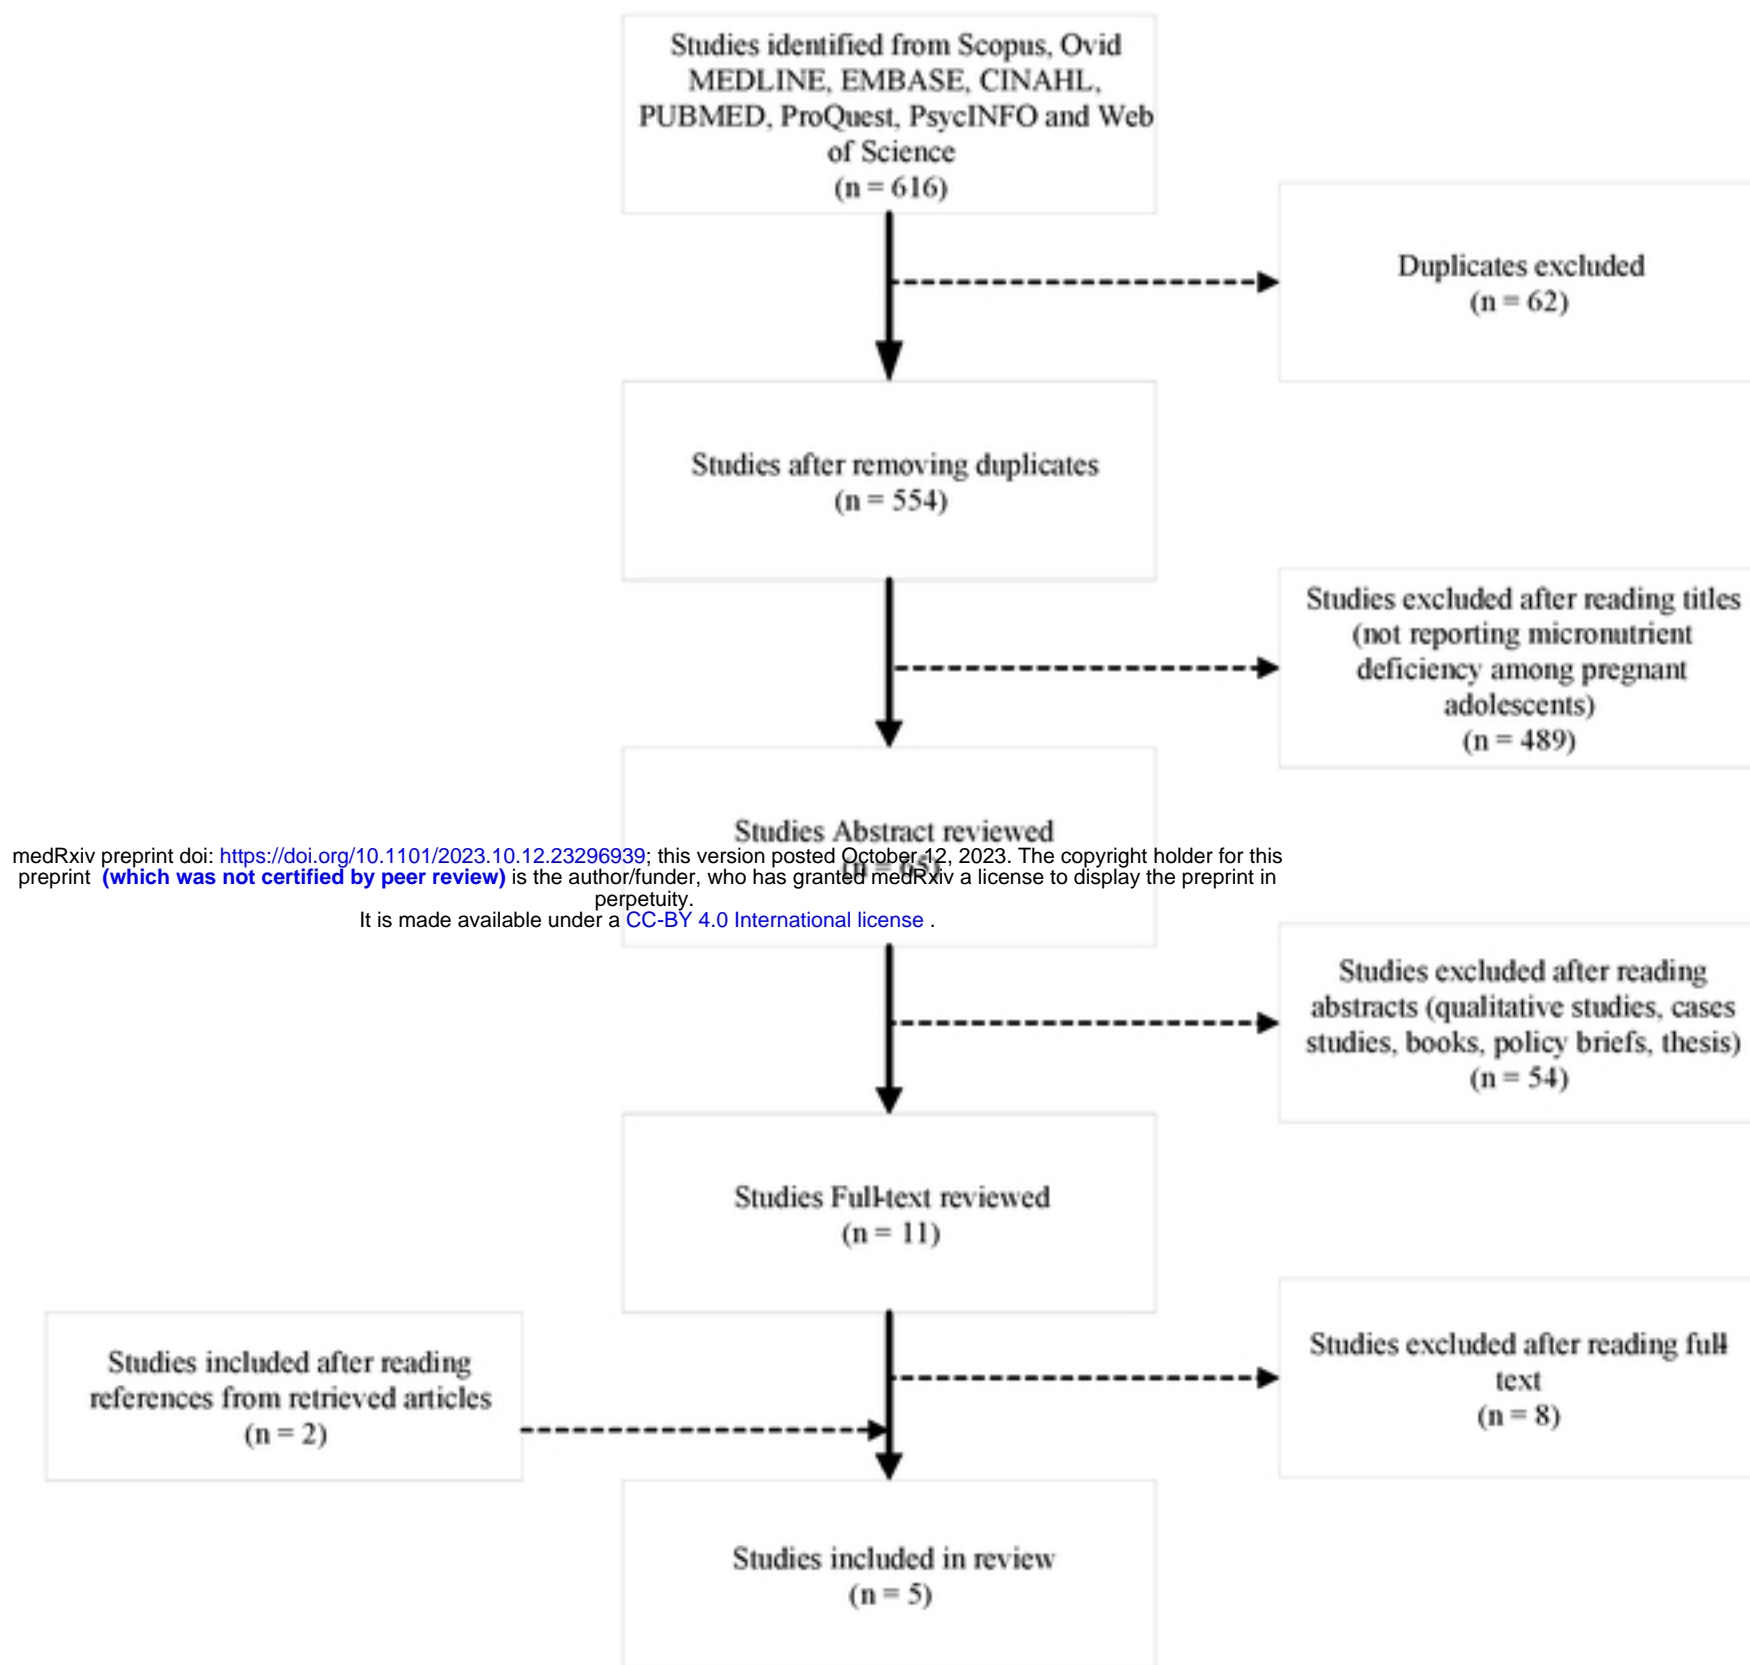

**Figure 1.** PRISMA flowchart for the selection of eligible studies
